# Supplementary material
Source: publisher figshare collection journal article supplement (https://acs.figshare.com/ndownloader/files/4463473)

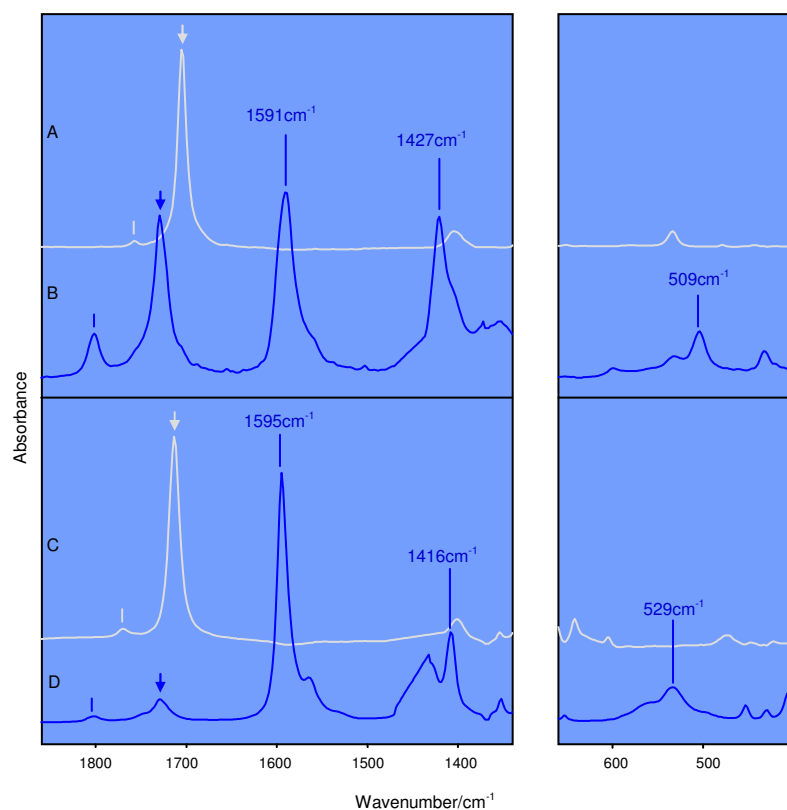

The vibrational spectra of A: adamantylcarboxylic acid, B:  $\text{Zn}_4\text{O}(\text{1-adamantylcarboxylate})_6$ , C: adamantylacetic acid, D:  $\text{Zn}_4\text{O}(\text{1-adamantylacetate})_6$  dissolved in decane in the 1850–1350  $\text{cm}^{-1}$  and 650–400  $\text{cm}^{-1}$  ranges. Band assignation:  $\nu_{\text{as}}\text{COO}^-$  1591  $\text{cm}^{-1}$ , 1595  $\text{cm}^{-1}$ ;  $\nu_{\text{s}}\text{COO}^-$  1427  $\text{cm}^{-1}$ , 1416  $\text{cm}^{-1}$ ;  $\nu_{\text{as}}\text{Zn}_4\text{O}$  528  $\text{cm}^{-1}$  and 529  $\text{cm}^{-1}$ ,  $\nu\text{C=O}$ : carboxylic acid dimer with grey arrow, monomeric carboxylic acid with grey line.

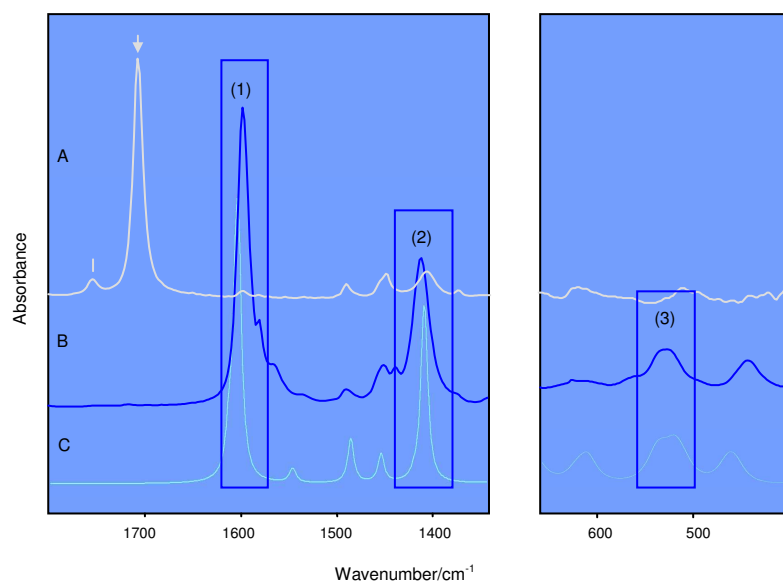

The experimental spectrum of 2-phenylbutanoic acid dissolved in C<sub>2</sub>Cl<sub>4</sub> (trace A) and the measured and the PM6 simulated and scaled spectra of Zn<sub>4</sub>O(2-phenylbutyrate)<sub>6</sub> (traces B – dissolved in C<sub>2</sub>Cl<sub>4</sub> – and C) in the 1800–1350 cm<sup>-1</sup> and 650–400 cm<sup>-1</sup> range. Band assignment:  $\nu_{as}\text{COO}^-$ : (1),  $\nu_s\text{COO}^-$ : (2) and  $\nu_{as}\text{Zn}_4\text{O}$ : (3),  $\nu\text{C=O}$ : carboxylic acid dimer with grey arrow, monomeric carboxylic acid with grey line.

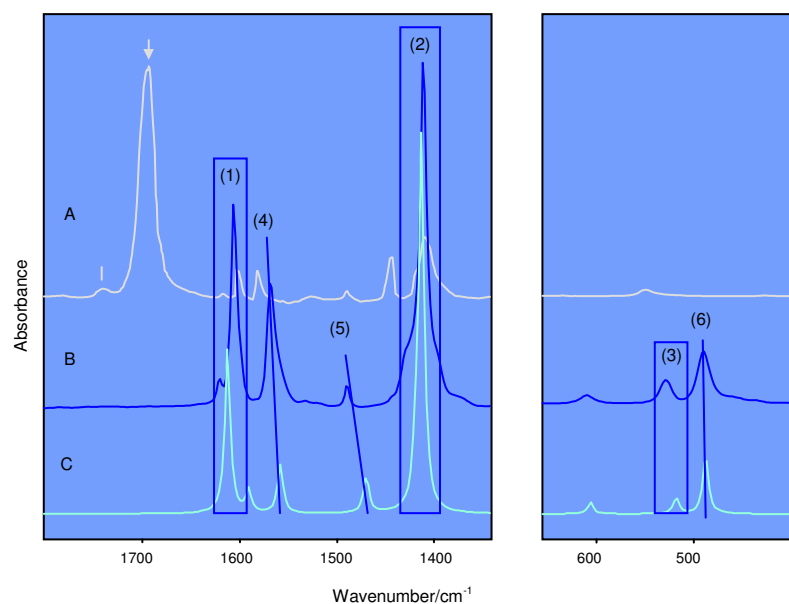

The experimental spectrum of benzoic acid dissolved in  $\text{C}_2\text{Cl}_4$  (trace A) and the measured and the 6-31G\*\* simulated and scaled spectra of  $\text{Zn}_4\text{O}(\text{benzoate})_6$  (traces B – dissolved in  $\text{C}_2\text{Cl}_4$  – and C) in the  $1800\text{--}1350\text{ cm}^{-1}$  and  $650\text{--}400\text{ cm}^{-1}$  range. Band assignment:  $\nu_{\text{as}}\text{COO}^-$ : (1),  $\nu_{\text{s}}\text{COO}^-$ : (2) and  $\nu_{\text{as}}\text{Zn}_4\text{O}$ : (3), (4), (5), (6),  $\nu\text{C=O}$ : carboxylic acid dimer with grey arrow, monomeric carboxylic acid with grey line.

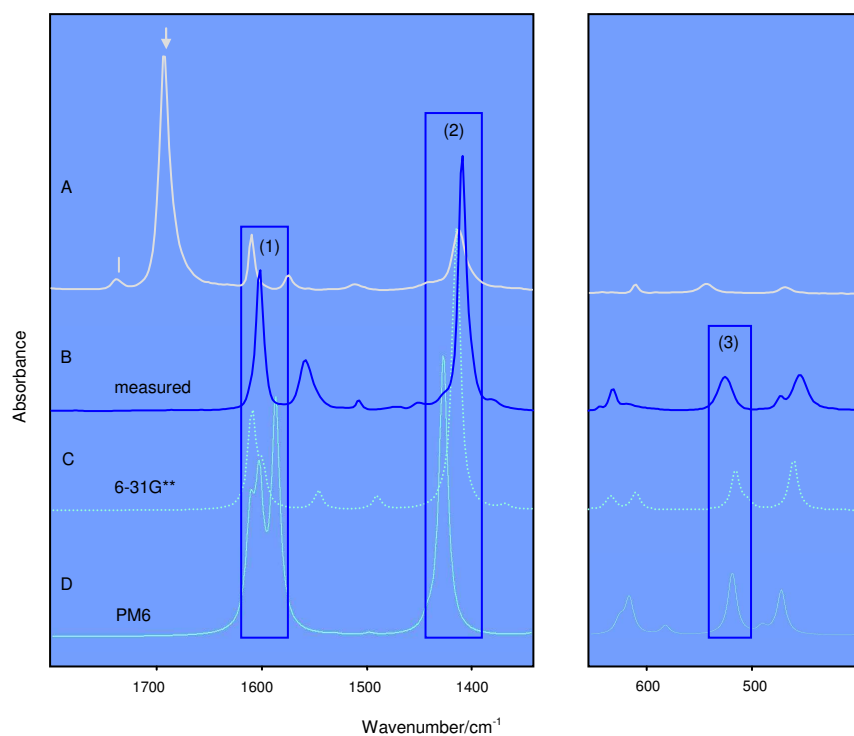

The experimental spectra of *para*-methylbenzoic acid and  $\text{Zn}_4\text{O}(\textit{para}\text{-methylbenzoate})_6$  (traces A and B, respectively, both materials dissolved in  $\text{C}_2\text{Cl}_4$ ) and the 6-31G\*\* and the PM6 simulated and scaled spectra of  $\text{Zn}_4\text{O}(\textit{para}\text{-methylbenzoate})_6$  (traces C and D, respectively) in the 1800–1350  $\text{cm}^{-1}$  and 650–400  $\text{cm}^{-1}$  range. Band assignment:  $\nu_{\text{as}}\text{COO}^-$ : (1),  $\nu_{\text{s}}\text{COO}^-$ : (2) and  $\nu_{\text{as}}\text{Zn}_4\text{O}$ : (3)  $\nu\text{C}=\text{O}$ : carboxylic acid dimer with grey arrow, monomeric carboxylic acid with grey line.

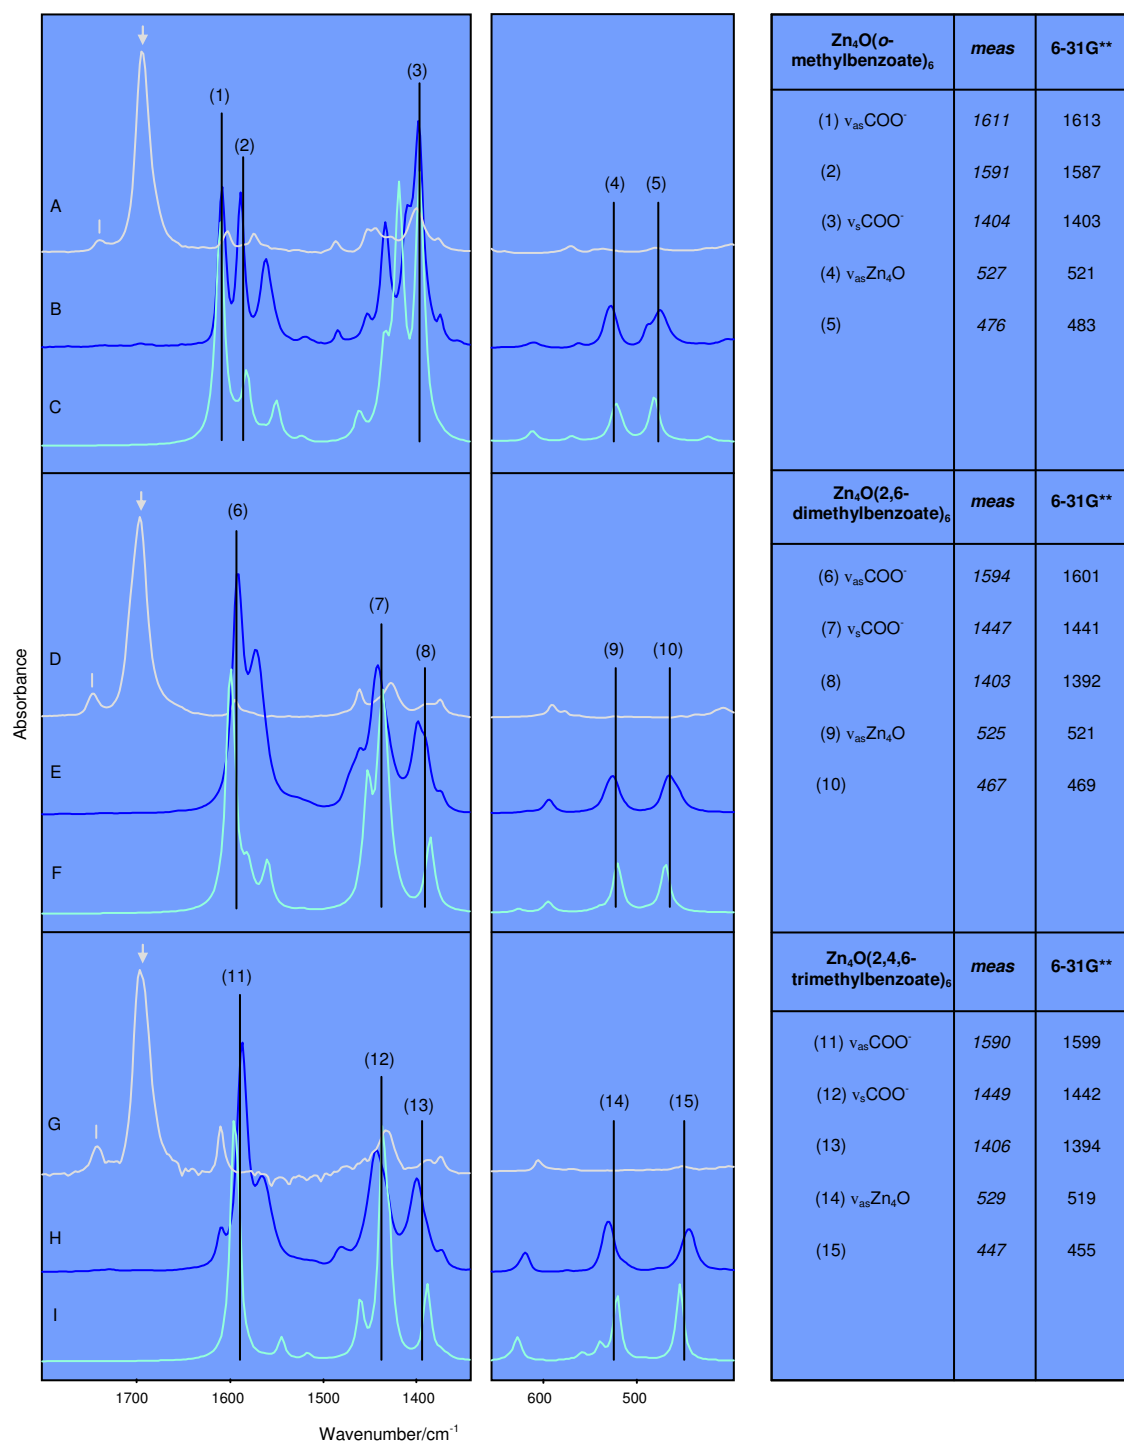

The experimental spectra of *ortho*-methylbenzoic acid and  $\text{Zn}_4\text{O}(\textit{ortho}\text{-methylbenzoate})_6$  (traces A and B, respectively, both materials dissolved in  $\text{C}_2\text{Cl}_4$ ), the 6-31G\*\* simulated and scaled spectra of  $\text{Zn}_4\text{O}(\textit{ortho}\text{-methylbenzoate})_6$  (trace C), the experimental spectra of 2,6-dimethylbenzoic acid and  $\text{Zn}_4\text{O}(\text{2,6-dimethylbenzoate})_6$  (traces D and E, respectively, both materials dissolved in  $\text{C}_2\text{Cl}_4$ ), the 6-31G\*\* simulated and scaled spectra of  $\text{Zn}_4\text{O}(\text{2,6-dimethylbenzoate})_6$  (trace F), the experimental spectra of 2,4,6-trimethylbenzoic acid and  $\text{Zn}_4\text{O}(\text{2,4,6-trimethylbenzoate})_6$  (traces G and H, respectively, both materials dissolved in  $\text{C}_2\text{Cl}_4$ ), the 6-31G\*\* simulated and scaled spectra of  $\text{Zn}_4\text{O}(\text{2,4,6-trimethylbenzoate})_6$  (trace I) in the 1800–1350  $\text{cm}^{-1}$  and 650–400  $\text{cm}^{-1}$  range. For band assignment, see the table,  $\nu\text{C=O}$ : carboxylic acid dimer with grey arrow, monomeric carboxylic acid with grey line.

Parameters used and obtained for and during calculating the scaling of wavenumbers computed on the 6-31G\*\* basis

|                                                           | Measured | 6-31G**<br>unscaled | 6-31G** scaled |
|-----------------------------------------------------------|----------|---------------------|----------------|
| Zn <sub>4</sub> O( <i>p</i> -methylbenzoate) <sub>6</sub> | 1605     | 1827                | 1612           |
|                                                           | 1416     | 1603                | 1421           |
|                                                           | 525      | 545                 | 516            |
|                                                           | 1563     | 1754                | 1550           |
|                                                           | 451      | 482                 | 463            |
| Zn <sub>4</sub> O( <i>o</i> -methylbenzoate) <sub>6</sub> | 1611     | 1828                | 1613           |
|                                                           | 1404     | 1582                | 1403           |
|                                                           | 527      | 550                 | 521            |
|                                                           | 1591     | 1797                | 1587           |
|                                                           | 1565     | 1759                | 1554           |
| Zn <sub>4</sub> O(2,4,6-trimethylbenzoate) <sub>6</sub>   | 1590     | 1812                | 1599           |
|                                                           | 529      | 548                 | 519            |
|                                                           | 447      | 473                 | 455            |
| Zn <sub>4</sub> O(2,6-dimethylbenzoate) <sub>6</sub>      | 1594     | 1814                | 1601           |
|                                                           | 525      | 550                 | 521            |
|                                                           | 467      | 490                 | 469            |
| parameters                                                | 0.8548   | 50.5016             |                |
| error                                                     | 0.003218 | 4.2661              |                |
| R <sup>2</sup>                                            | 0.9998   |                     |                |

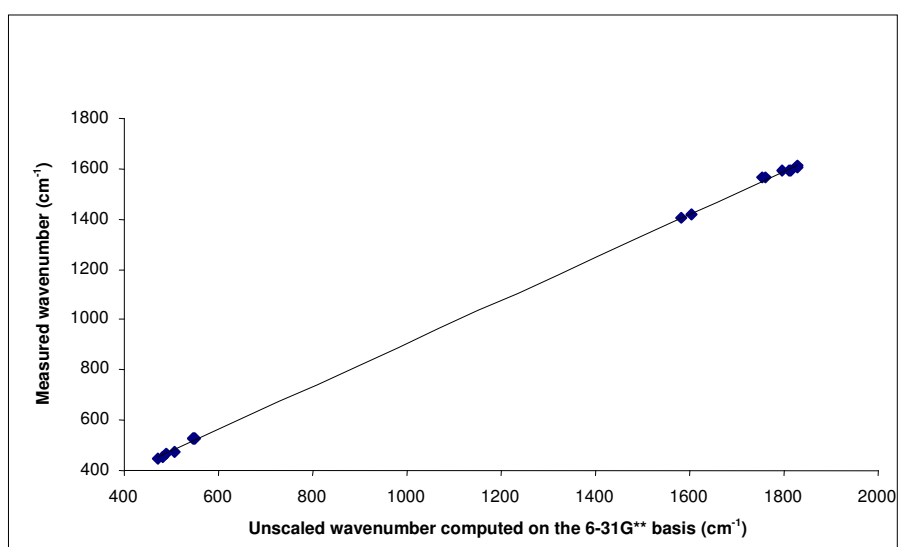

Parameters used and obtained for and during calculating the scaling of wavenumbers computed by the PM6 method

|                                                           | Measured | PM6 unscaled | PM6 scaled |
|-----------------------------------------------------------|----------|--------------|------------|
| Zn <sub>4</sub> O( <i>p</i> -methylbenzoate) <sub>6</sub> | 1605     | 1620         | 1590       |
|                                                           | 1416     | 1455         | 1433       |
|                                                           | 525      | 495          | 518        |
|                                                           | 451      | 446          | 471        |
| Zn <sub>4</sub> O(cyclohexylcarboxylate) <sub>6</sub>     | 1591     | 1631         | 1601       |
|                                                           | 1431     | 1438         | 1417       |
|                                                           | 515      | 495          | 518        |
| Zn <sub>4</sub> O(cyclohexylacetate) <sub>6</sub>         | 1595     | 1636         | 1605       |
|                                                           | 1443     | 1455         | 1433       |
|                                                           | 530      | 493          | 516        |
| Zn <sub>4</sub> O(2-phenylbutirate) <sub>6</sub>          | 1601     | 1637         | 1606       |
|                                                           | 1418     | 1436         | 1415       |
|                                                           | 522      | 490          | 513        |
|                                                           | 441      | 430          | 456        |
| parameter                                                 | 0.9542   | 44.3685      |            |
| error                                                     | 0.006508 | 7.8488       |            |
| R <sup>2</sup>                                            | 0.9994   |              |            |

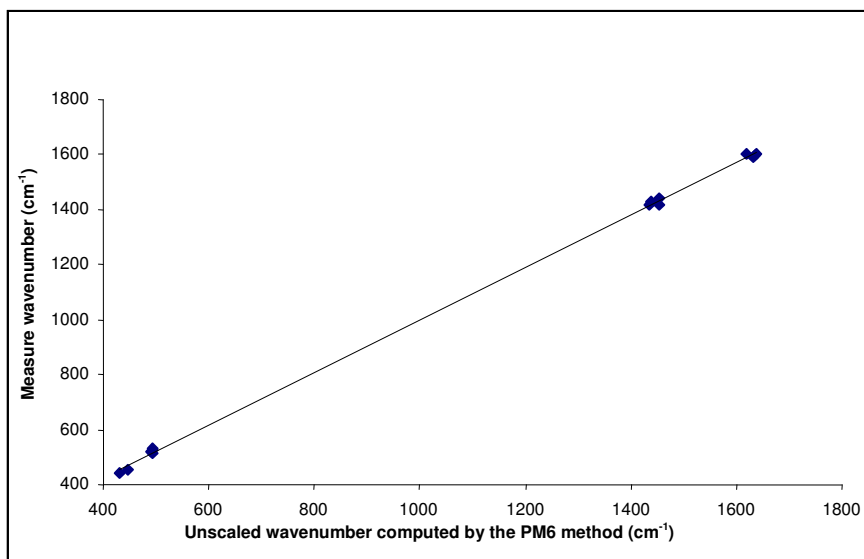

Supplement: Supplementary file 1 [file 4463473]
